# Supplementary material for: Biodegradable dextran vesicles for effective haemoglobin encapsulation
Source: Royal Society of Chemistry journal article supplement (doi:10.1039/c5tb00847f), 2015-01-01
Supplement: c5tb00847f1.pdf [file c5tb00847f1.pdf]

# Biodegradable dextran vesicles for effective Hemoglobin Encapsulation

Weiqli Wang,<sup>ab</sup> Shi Liu,<sup>a</sup> Yubin Huang,<sup>a</sup> Xiabin Jing,<sup>a</sup> Zhigang Xie,<sup>a\*</sup>

<sup>†</sup> *State Key Laboratory of Polymer Physics and Chemistry, Changchun Institute of Applied Chemistry, Chinese Academy of Sciences, Changchun 130022, P. R. China.*

<sup>‡</sup> *The University of Chinese Academy of Sciences, Beijing 100049, P. R. China*

\* *E-mail: xiez@ciac.ac.cn; Tel/Fax: +86-431-85262779.*

## **Content:**

**Fig. S1** The GPC curve of the dextran-g-PLA, dextran-g-PLA1 (a), dextran-g-PLA2 (b), dextran-g-PLA3 (c) and dextran-g-PLA4(d).

**Fig. S2** The stability of nanoparticles according to time.

**Fig. S3** TEM images of HbVs (dextran-g-PLA3) and size distribution determined by DLS.

**Fig. S4** SDS-PAGE.

**Fig. S5** Hb leakage profile of HbVs suspended in PBS (0.2M, pH 7.4).

**Fig. S6** The morphology changes according to time of the RBC in microscopy.

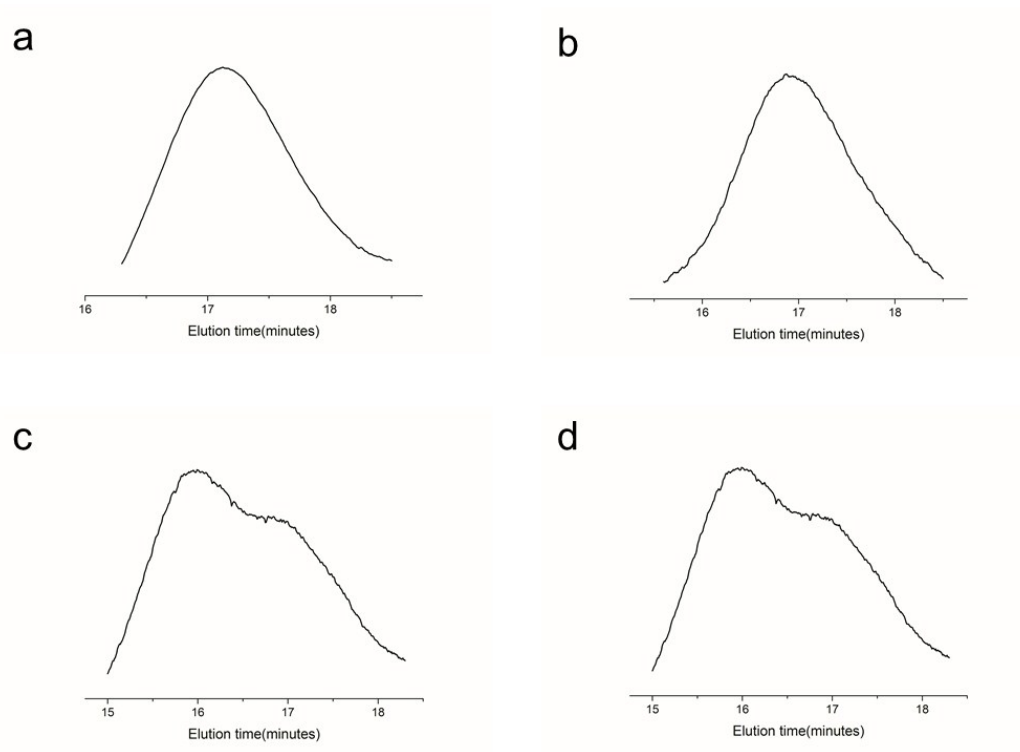

Fig. S1 The GPC curve of the dextran-PLA, dextran-PLA1 (a), dextran-PLA2 (b), dextran-PLA3 (c) and dextran-PLA4 (d).

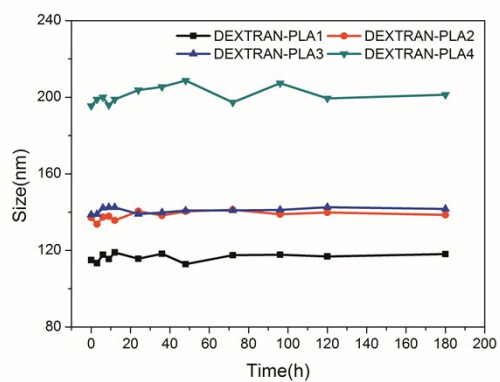

Fig. S2 The stability of nanoparticles according to time.

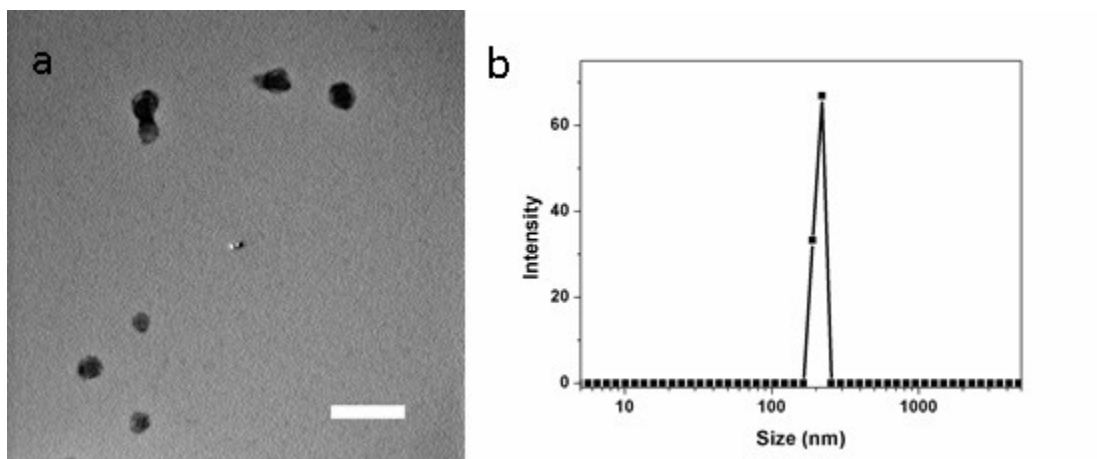

Fig. S3 TEM images of HbVs (a) and size distribution determined by DLS(b). The material is dextran-g-PLA3 and the scale bar stands for 500nm.

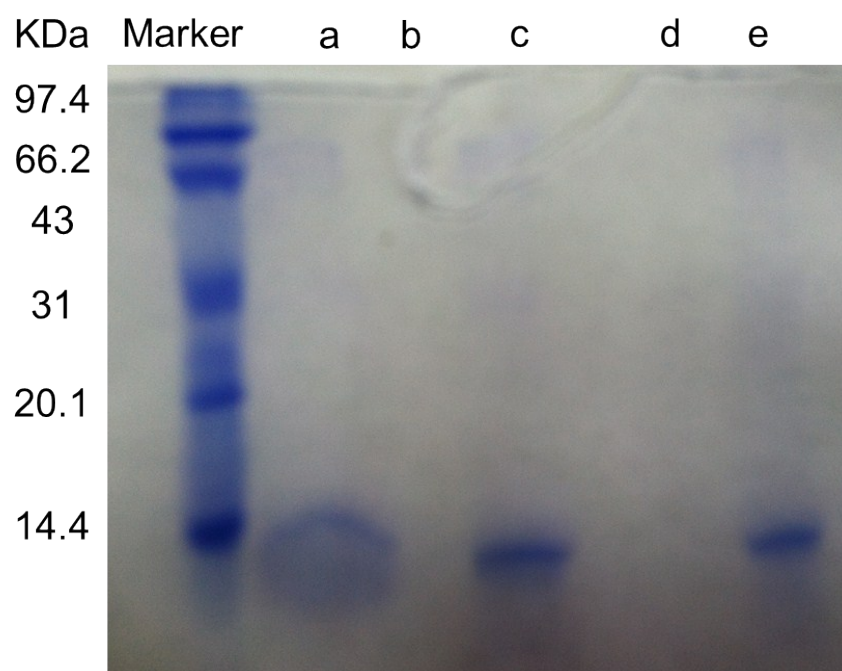

Fig. S4 The image of SDS-PAGE. HbV1+Triton (a), HbV1 (b), Hb (c), HbV2 (d) and HbV2+Triton (e). HbV1(dextran-g-PLA3) ,HbV2(dextran-g-PLA4).

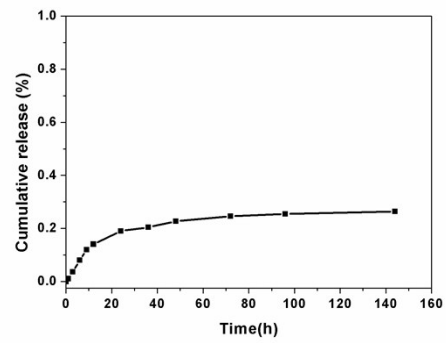

Fig. S5 Hb leakage profile of HbVs suspended in PBS (0.2M, pH 7.4).

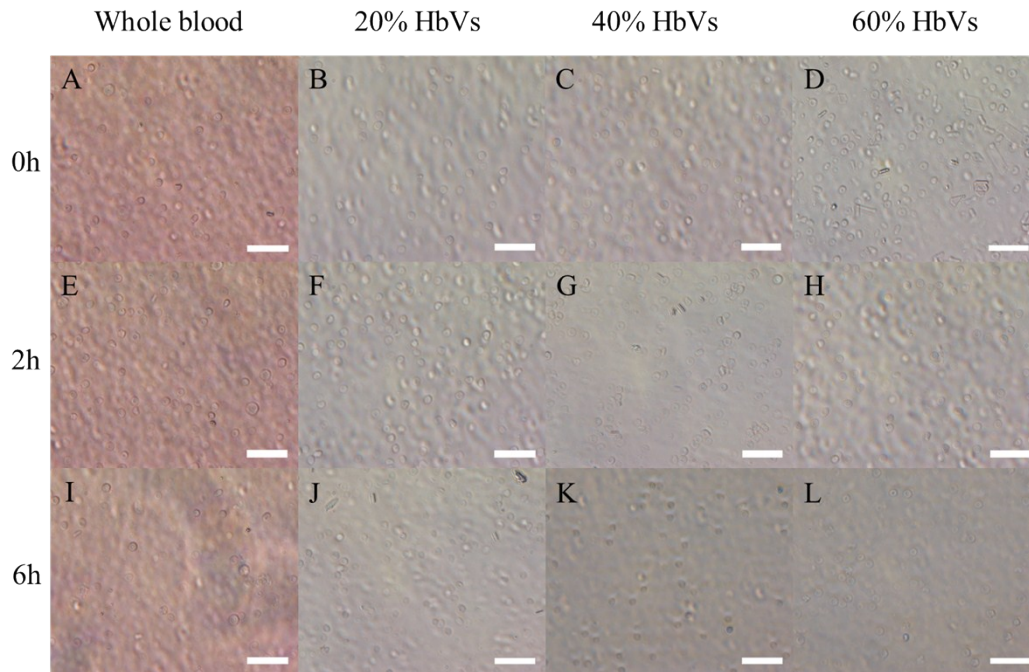

Fig. S6. The morphology changes of the RBC in microscopy with different time. The scale bar stands for 10 $\mu$ m.

**Note:**

The stability experiment was carried out by ZS Nano90 instrument equipped with a He-Ne laser at a scattering angle of 90°.
